RESEARCH ARTICLE

# An *In Vivo* Metabolic Approach for Deciphering the Product Specificity of Glycerate Kinase Proves that Both *E. coli*'s Glycerate Kinases Generate 2-Phosphoglycerate

Lior Zelcbuch<sup>1</sup>, Manuel Razo-Mejia<sup>1,2</sup>, Elad Herz<sup>1</sup>, Sagit Yahav<sup>1</sup>, Niv Antonovsky<sup>1</sup>, Hagar Kroytoro<sup>1</sup>, Ron Milo<sup>1</sup>, Arren Bar-Even<sup>1,3\*</sup>

**1** Department of Plant and Environmental Sciences, Weizmann Institute of Science, Rehovot Israel, **2** Department of Biochemistry and Molecular Biophysics, California Institute of Technology, Pasadena, California, United States of America, **3** Max Planck Institute of Molecular Plant Physiology, Potsdam-Golm, Germany

\* [Bar-Even@mpimp-golm.mpg.de](mailto:Bar-Even@mpimp-golm.mpg.de)

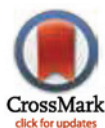

OPEN ACCESS

**Citation:** Zelcbuch L, Razo-Mejia M, Herz E, Yahav S, Antonovsky N, Kroytoro H, et al. (2015) An *In Vivo* Metabolic Approach for Deciphering the Product Specificity of Glycerate Kinase Proves that Both *E. coli*'s Glycerate Kinases Generate 2-Phosphoglycerate. PLoS ONE 10(3): e0122957. doi:10.1371/journal.pone.0122957

**Academic Editor:** Ivan Berg, University of Freiburg, GERMANY

**Received:** January 16, 2015

**Accepted:** February 19, 2015

**Published:** March 30, 2015

**Copyright:** © 2015 Zelcbuch et al. This is an open access article distributed under the terms of the [Creative Commons Attribution License](https://creativecommons.org/licenses/by/4.0/), which permits unrestricted use, distribution, and reproduction in any medium, provided the original author and source are credited.

**Data Availability Statement:** All data is disclosed in the manuscript.

**Funding:** European Research Council (Project SYMPAC 260392, <http://erc.europa.eu/synthetic-metabolic-pathways-carbon-fixation>). The funders had no role in study design, data collection and analysis, decision to publish, or preparation of the manuscript.

**Competing Interests:** The authors have declared that no competing interests exist.

## Abstract

Apart from addressing humanity's growing demand for fuels, pharmaceuticals, plastics and other value added chemicals, metabolic engineering of microbes can serve as a powerful tool to address questions concerning the characteristics of cellular metabolism. Along these lines, we developed an *in vivo* metabolic strategy that conclusively identifies the product specificity of glycerate kinase. By deleting *E. coli*'s phosphoglycerate mutases, we divide its central metabolism into an 'upper' and 'lower' metabolism, each requiring its own carbon source for the bacterium to grow. Glycerate can serve to replace the upper or lower carbon source depending on the product of glycerate kinase. Using this strategy we show that while glycerate kinase from *Arabidopsis thaliana* produces 3-phosphoglycerate, both *E. coli*'s enzymes generate 2-phosphoglycerate. This strategy represents a general approach to decipher enzyme specificity under physiological conditions.

## Introduction

The identification of the *in vivo* substrates of enzymes can be, in some cases, a non-trivial challenge. In fact, numerous enzymes, most belonging to secondary metabolism, were assigned a new catalytic role after further studies shed light on their actual role *in vivo*, e.g., [1–4]. More uncommon are cases in which the substrate itself is known but the residue on which the enzyme acts is unclear. *E. coli*'s glycerate kinase enzymes present such an interesting case in central carbon metabolism. During the last decades several studies on the bacterium's two glycerate kinases, encoded by *garK* and *glxK*, were published. Earlier *in vitro* assays claimed that these enzymes generate 3-phosphoglycerate [5,6] while more recent studies, using

advanced experimental methodologies, provided evidence that 2-phosphoglycerate is the product of the enzymes [7,8]. In fact, even the physiological role of the two enzymes seems to be disputed. For example, while it was claimed that *glxK* is necessary for growth on glycolate [9] we found that a deletion of *glxK* resulted in no clear phenotype when glycolate, glyoxylate or glycerate are provided as sole carbon sources. On the other hand, deletion of *garK* led to a severe retardation of growth using these substrates.

Although the *in vitro* experiments supporting 2-phosphoglycerate as being the product of *E. coli*'s glycerate kinase enzymes are quite compelling (see discussion in [8]), we reasoned that this metabolic conundrum could also be addressed by using an *in vivo* metabolic selection strategy. By employing such a metabolic engineering approach we unequivocally demonstrate that the product of both glycerate kinase variants is indeed 2-phosphoglycerate, thereby suggesting that a glycerate 3-kinase activity is missing in *E. coli*.

## Results & Discussion

To resolve the product specificity of *garK* and *glxK* we developed an *in vivo* metabolic assay that identifies the enzyme product via a simple growth selection experiment. We started by deleting the two endogenous phosphoglycerate mutase enzymes ( $\Delta$ *gpmA*,  $\Delta$ *gpmM*). As far as we know, this is the first time such a double knockout mutant was generated [10]. The central metabolism of this strain is effectively cut into 'upper' and 'lower' metabolism, as shown in Fig 1A. For this strain to grow on a minimal medium, it should be supplied with two carbon sources (Fig 1B), an 'upper' one, *e.g.*, glycerol, and a 'lower' one, *e.g.*, pyruvate (for an analogous approach in a completely different context see refs. [11,12]). The  $\Delta$ *gpmA*  $\Delta$ *gpmM* strain grew on glycerol and pyruvate at a doubling time of ~120 minutes. We further deleted *garK* and *glxK* to establish a glycerate kinase-free background. This background enables a direct selection for glycerate 2-kinase and 3-kinase activities by modulating the growth medium: glycerate can replace the lower carbon source if glycerate 2-kinase activity is present (Fig 1C); alternatively, glycerate can replace the upper carbon source if glycerate 3-kinase activity is present (Fig 1D).

We tested three glycerate kinases by overexpressing them in the above strain: *E. coli*'s protein products of *garK* (*Ec garK*) and *glxK* (*Ec glxK*), as well as *Arabidopsis thaliana*'s glycerate kinase (*At glyK*), which is known to produce 3-phosphoglycerate [13]. The results are shown in Fig 2 and summarized in Table 1. The expression of *Ec garK* or *Ec glxK* enabled glycerate to replace pyruvate as a carbon source, while *At glyK* expression enabled glycerate to replace glycerol as a carbon source. The WT strain displays a considerable yield difference between growth on glycerol + glycerate and growth on pyruvate + glycerate, probably due to the fact that glycerol is considerably more reduced than pyruvate [14]. This is also reflected in yields of the  $\Delta$ *gpmA*,  $\Delta$ *gpmM* strains, which were about half of the WT strain (Fig 2).

These findings clearly demonstrate that while *At glyK* is indeed specific to 3-phosphoglycerate, both *E. coli*'s glycerate kinases produce 2-phosphoglycerate. Notably, current metabolic models of *E. coli* suggest that the bacterium has a glycerate 3-kinase enzyme (*e.g.*, ref. [15]); these models should be amended according to the findings we show here.

What is the physiological difference between phosphorylating glycerate at the alpha position and the beta position? We speculate that the main difference is energetic. The proximity of the negatively charged phosphate to the negatively charged carboxyl in 2-phosphoglycerate makes it more energetic than 3-phosphoglycerate (*i.e.*, having higher Gibbs energy of formation). In fact, the conversion of 3-phosphoglycerate to 2-phosphoglycerate has  $\Delta_r G^\circ > +6$  kJ/mol under *E. coli*'s physiological conditions of pH 7.5 and ionic strength of 0.25 M [16]. As the glycerate kinase reaction dissipates a lot of energy regardless of the exact product it generates ( $\Delta_r G^\circ < -18$  kJ/mol, under the same conditions), it makes perfect sense for the cell to produce the more

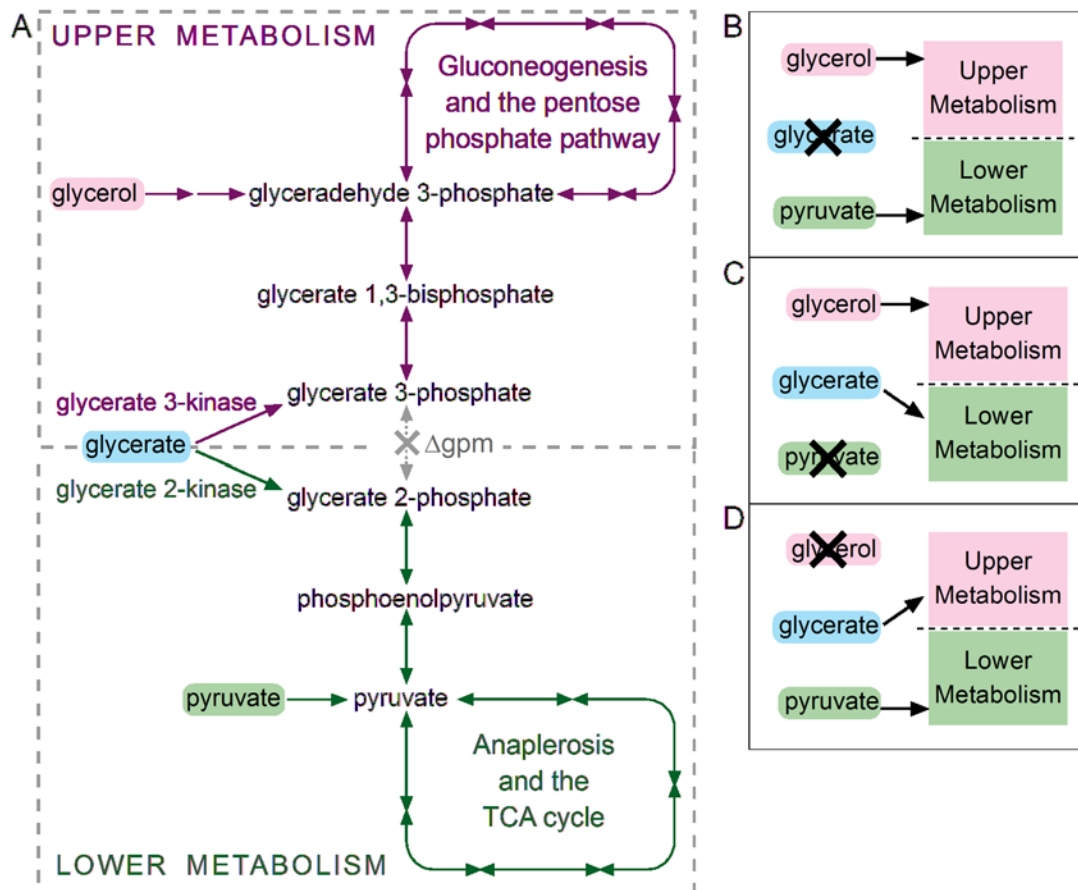

**Fig 1. Selection scheme for identifying the product specificity of glycerate kinase.** (A-D) By deleting phosphoglycerate mutase, central metabolism is divided into 'upper' and 'lower' metabolism, each requires its own carbon source for the bacterium to grow (glycerol and pyruvate, respectively). Glycerate can replace one of these carbon sources, depending on the product specificity of glycerate kinase.

doi:10.1371/journal.pone.0122957.g001

energetic compound that can be converted to its counterpart favorably. If 3-phosphoglycerate was the kinase's product, its conversion to 2-phosphoglycerate and its downstream metabolites will suffer from a reduced thermodynamic driving force due to the energetic barrier [17]. A notable exception is when almost all the flux is channeled in the gluconeogenesis direction, as is the case of the glycerate kinases that participate in plant photorespiration [18]. In this case, the direct production of 3-phosphoglycerate is advantageous as it reduces significantly the amount of phosphoglyceromutase needed to be expressed.

The methodology we describe here, of using a metabolic assay with an easily readable growth output, is a useful tool to decipher the *in vivo* specificity of enzymes (e.g., see ref. [19]). The strategy has some drawbacks, e.g., enzyme promiscuous activity can result in a false positive result, especially at high expression levels of the enzyme in question. Yet, if one carefully controls for such effects, the metabolic selection strategy can clearly identify the substrates as well as products of various different enzymes. For example, to elucidate whether an enzyme is a decarboxylating or a non-decarboxylating malate dehydrogenase [20], one can apply a metabolic assay involving two strains. In the first strain all endogenous malate dehydrogenase and malic enzyme variants are deleted, together with the anaplerotic and cataplerotic enzymes. Upon overexpression of reversible PEP carboxykinase [21] and the enzyme in question, growth will be established on glutamine as a sole carbon source [22] if and only if the enzyme in

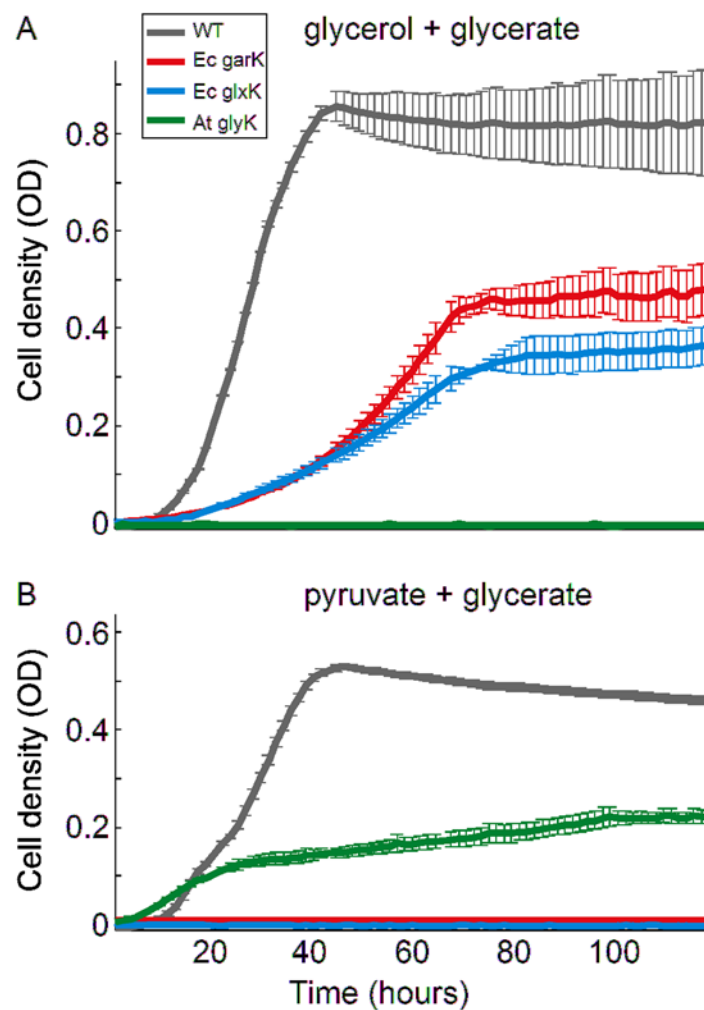

**Fig 2. Product specificity of glycerate kinases from *E. coli* and *A. thaliana*.** (A) A  $\Delta gpmA \Delta gpmM \Delta garK \Delta glxK$  strain was able to grow on a minimal medium supplemented with glycerol and glycerate when one of *E. coli*'s glycerate kinases were expressed, indicating that these enzymes generate 2-phosphoglycerate. (B) Growth on pyruvate and glycerate was possible only when *A. thaliana*'s glycerate kinase was expressed, indicating that this enzyme produces 3-phosphoglycerate. Cells were cultivated in 96-multiwell plates and OD measurements were taken automatically every 90 minutes. For each enzyme, we show the growth of one clone with standard errors (at each time point) that are based on three parallel cultivations. Other clones showed a similar qualitative dependence on the carbon sources with somewhat different growth yield and dynamics.

doi:10.1371/journal.pone.0122957.g002

question is indeed a malate dehydrogenase, whether decarboxylating or not. The second strain is identical to the first one with an additional deletion of PEP synthetase. This strain, also expressing PEP carboxykinase and the enzyme in question, would be able to grow on glutamine only if the malate dehydrogenase is non-decarboxylating, such that oxaloacetate can accumulate and be converted to PEP and other gluconeogenic intermediates. As demonstrated in this study, the main advantage of a metabolic assay strategy is that it does not rely on *in vitro* methods performed under changing artificial conditions that can lead to contradicting results. Rather, this approach tests the enzyme under physiological conditions and thus can undisputedly assign specificities in a simple and highly reproducible manner.

**Table 1. Summary of selection experiments on a minimal medium supplemented with different carbon sources.**

| Carbon sources       | Expressed enzymes |         |         |
|----------------------|-------------------|---------|---------|
|                      | Ec garK           | Ec glxK | At glyK |
| Glycerol             | –                 | –       | –       |
| Pyruvate             | –                 | –       | –       |
| Glycerate            | –                 | –       | –       |
| Glycerol + Pyruvate  | +                 | +       | +       |
| Glycerol + Glycerate | +                 | +       | –       |
| Pyruvate + Glycerate | –                 | –       | +       |

Different glycerate kinase variants were expressed in the *ΔgpmA ΔgpmM ΔgarK ΔglxK* strain and growth phenotypes on different carbon sources were measured. A ‘–’ sign corresponds to experiments that showed no growth, while a ‘+’ sign corresponds to growth. Cells were cultivated in 96-multiwell plates using an automated robotic platform (exact experimental setup is given in [Materials and Methods](#)).

doi:10.1371/journal.pone.0122957.t001

## Materials and Methods

### Cloning

*E. coli*'s *garK* and *glxK* genes were amplified directly from an *E. coli* K12 Mg1665 strain. The gene encoding for At glyK was amplified from *Arabidopsis thaliana*'s cDNA library. The primers used are given below. Cloning was done using the “no background” cloning method we previously developed [23]; the glycerate kinase genes were attached to RBS ‘E’ within the Pniv plasmid, and then inserted to a Ptac plasmid as described in details in ref. [23]. The EcoRI and SalI restriction sites that exist within the endogenous *glxK* and *Arabidopsis*'s *glyK* genes were removed using a silent point mutation via the overhang extension procedure (primers used are given below) [24].

Gene deletions were performed using a standard P1 phage transduction [25]; all donor strains were taken from Keio collection [26]. We used PCP20 to mediate a flippase catalyzed excision of the antibiotic-resistance [27], thereby enabling further gene deletions using the same resistance marker.

Primers:

|                          |                                                                |
|--------------------------|----------------------------------------------------------------|
| Ec garK Forward          | ATGCATCATCACCATCACCACGCGTATTGCAATCCGGGCCTGGAATC                |
| Ec garK Reverse          | CTCTTACGTGCCCGATCAACGCTAGCTTACCCCGCGTTGCGCATTCCAATCG           |
| Ec glxK Forward          | ATGCATCATCACCATCACCACAAGATTGTCTATTGCGCCAGACTC                  |
| Ec glxK Reverse          | CTCTTACGTGCCCGATCAACGCTAGCTTATTTTAAATCCCTGACCTA<br>TTTTAATGGCG |
| Ec glxK C435G<br>Forward | GTGCGACGGTTGACGGCGGTATGGGCATGG                                 |
| Ec glxK C435G<br>Reverse | CCATGCCCATACCGCCGTC AACCGTCGCAC                                |
| At glyK Forward          | ATGCATCATCACCATCACC ACTTCTTATTTATCTCCAAGCTT                    |
| At glyK Reverse          | CTCTTACGTGCCCGATCAACGCTAGCTTAGTTTGCAGATATCGGGTTCCTTTC          |
| At glyK C314T<br>Forward | TTTTGAATTTATATGCTCGGGTCTCTCGT                                  |
| At glyK C314T<br>Reverse | ACGAGAGGACCCGAGCATATAAATTCAAAA                                 |

doi:10.1371/journal.pone.0122957.t002

## Growth assays

The different strains were grown overnight in 5 ml LB media containing Kanamycin (50mg/L) and chloramphenicol (30mg/L). Following OD measurements, we centrifuged  $\sim 10^9$  cells for 1 min at 9,500 g. The pellets were re-suspended in 1 ml of M9 medium, from which 10  $\mu$ l were dispensed into a 96-multiwell plate. Each well also contained 200  $\mu$ l of M9 medium supplemented with 0.2% appropriate carbon sources, as well as antibiotics (kanamycin 50mg/L and chloramphenicol 30mg/L). Notably, by taking  $\approx 10^9$  cells for the initial centrifuge, we made sure that the initial OD in each well is  $\approx 0.05$ .

The plates were cultivated within a LiCONiC incubator shaker at 37°C, 100% humidity and ambient gas composition. Every 90 minutes plates were automatically carried by a robotic arm (Evoaware II, Tecan) to a plate reader (Infinite M200-pro, Tecan), in which OD (600nm) measurements were taken.

We picked several clones of each transformation for growth experiments. Different clones of the same strains were found to share the same qualitative growth phenotype, although with somewhat different growth yield and dynamics.

## Acknowledgments

The authors thank all members of the Milo lab for helpful discussions and assistance with the experimental work. We further thank Qamar Ghanem, Miriam Ghanim, Orly Samcha and Natasha Segal for assistance at the early stage of this study. We are grateful to Prof. Asaph Aharoni for providing us with *Arabidopsis thaliana*'s cDNA library.

## Author Contributions

Conceived and designed the experiments: LZ RM ABE. Performed the experiments: LZ MRM EH SY NA HK. Analyzed the data: LZ RM ABE. Contributed reagents/materials/analysis tools: LZ NA. Wrote the paper: LZ RM ABE.

## References

1. Khersonsky O, Tawfik DS. Structure-reactivity studies of serum paraoxonase PON1 suggest that its native activity is lactonase. *Biochemistry*. 2005; 44: 6371–6382. PMID: [15835926](#)
2. Erb TJ, Evans BS, Cho K, Warlick BP, Sriram J, Wood BM, et al. A RubisCO-like protein links SAM metabolism with isoprenoid biosynthesis. *Nat Chem Biol*. 2012; 8: 926–932. doi: [10.1038/nchembio.1087](#) PMID: [23042035](#)
3. Vinokur JM, Korman TP, Cao Z, Bowie JU. Evidence of a novel mevalonate pathway in archaea. *Biochemistry*. 2014; 53: 4161–4168. doi: [10.1021/bi500566q](#) PMID: [24914732](#)
4. Gandia Herrero F, Garcia Carmona F. *Escherichia coli* protein YgiD produces the structural unit of plant pigments betalains: characterization of a prokaryotic enzyme with DOPA-extradiol-dioxygenase activity. *Appl Microbiol Biotechnol*. 2014; 98: 1165–1174. doi: [10.1007/s00253-013-4961-3](#) PMID: [23666480](#)
5. Doughty CC, Hayashi JA, Guenther HL. Purification and properties of D-glycerate 3-kinase from *Escherichia coli*. *J Biol Chem*. 1966; 241: 568–572. PMID: [5325263](#)
6. Ormston MK, Ormston LN. Two forms of D-glycerate kinase in *Escherichia coli*. *J Bacteriol*. 1969; 97: 1227–1233. PMID: [4887503](#)
7. Hubbard BK, Koch M, Palmer DR, Babbitt PC, Gertt JA. Evolution of enzymatic activities in the enolase superfamily: characterization of the (D)-glucarate/galactarate catabolic pathway in *Escherichia coli*. *Biochemistry*. 1998; 37: 14369–14375. PMID: [9772162](#)
8. Bartsch O, Hagemann M, Bauwe H. Only plant-type (GLYK) glycerate kinases produce d-glycerate 3-phosphate. *FEBS Lett*. 2008; 582: 3025–3028. doi: [10.1016/j.febslet.2008.07.038](#) PMID: [18675808](#)
9. Cusa E, Obradors N, Baldoma L, Badia J, Aguilar J. Genetic analysis of a chromosomal region containing genes required for assimilation of allantoin nitrogen and linked glyoxylate metabolism in *Escherichia coli*. *J Bacteriol*. 1999; 181: 7479–7484. PMID: [10601204](#)



10. Foster JM, Davis PJ, Raverdy S, Sibley MH, Raleigh EA, Kumar S, et al. Evolution of bacterial phosphoglycerate mutases: non-homologous isofunctional enzymes undergoing gene losses, gains and lateral transfers. *PLoS One*. 2010; 5: e13576. doi: [10.1371/journal.pone.0013576](https://doi.org/10.1371/journal.pone.0013576) PMID: [21187861](https://pubmed.ncbi.nlm.nih.gov/21187861/)
11. Wellner A, Raitses Gurevich M, Tawfik DS. Mechanisms of protein sequence divergence and incompatibility. *PLoS Genet*. 2013; 9: e1003665. doi: [10.1371/journal.pgen.1003665](https://doi.org/10.1371/journal.pgen.1003665) PMID: [23935519](https://pubmed.ncbi.nlm.nih.gov/23935519/)
12. Irani MH, Maitra PK. Properties of *Escherichia coli* mutants deficient in enzymes of glycolysis. *J Bacteriol*. 1977; 132: 398–410. PMID: [410789](https://pubmed.ncbi.nlm.nih.gov/410789/)
13. Boldt R, Edner C, Kolukisaoglu U, Hagemann M, Weckwerth W, Wienkoop S, et al. D-GLYCERATE 3-KINASE, the last unknown enzyme in the photorespiratory cycle in *Arabidopsis*, belongs to a novel kinase family. *Plant Cell*. 2005; 17: 2413–2420. PMID: [15980259](https://pubmed.ncbi.nlm.nih.gov/15980259/)
14. Andersen KB, von Meyenburg K. Are growth rates of *Escherichia coli* in batch cultures limited by respiration? *J Bacteriol*. 1980; 144: 114–123. PMID: [6998942](https://pubmed.ncbi.nlm.nih.gov/6998942/)
15. Orth JD, Conrad TM, Na J, Lerman JA, Nam H, Feist AM, et al. A comprehensive genome-scale reconstruction of *Escherichia coli* metabolism—2011. *Mol Syst Biol*. 2011; 7: 535. doi: [10.1038/msb.2011.65](https://doi.org/10.1038/msb.2011.65) PMID: [21988831](https://pubmed.ncbi.nlm.nih.gov/21988831/)
16. Flamholz A, Noor E, Bar Even A, Milo R. eQuilibrator—the biochemical thermodynamics calculator. *Nucleic Acids Res*. 2012; 40: D770–775. doi: [10.1093/nar/gkr874](https://doi.org/10.1093/nar/gkr874) PMID: [22064852](https://pubmed.ncbi.nlm.nih.gov/22064852/)
17. Noor E, Bar Even A, Flamholz A, Reznik E, Liebermeister W, Milo R. Pathway thermodynamics highlights kinetic obstacles in central metabolism. *PLoS Comput Biol*. 2014; 10: e1003483. doi: [10.1371/journal.pcbi.1003483](https://doi.org/10.1371/journal.pcbi.1003483) PMID: [24586134](https://pubmed.ncbi.nlm.nih.gov/24586134/)
18. Bauwe H, Hagemann M, Fernie AR. Photorespiration: players, partners and origin. *Trends Plant Sci*. 2010; 15: 330–336. doi: [10.1016/j.tplants.2010.03.006](https://doi.org/10.1016/j.tplants.2010.03.006) PMID: [20403720](https://pubmed.ncbi.nlm.nih.gov/20403720/)
19. Pinchuk GE, Rodionov DA, Yang C, Li X, Osterman AL, Dervyn E, et al. Genomic reconstruction of *Shewanella oneidensis* MR-1 metabolism reveals a previously uncharacterized machinery for lactate utilization. *Proc Natl Acad Sci U S A*. 2009; 106: 2874–2879. doi: [10.1073/pnas.0806798106](https://doi.org/10.1073/pnas.0806798106) PMID: [19196979](https://pubmed.ncbi.nlm.nih.gov/19196979/)
20. Tao X, Yang Z, Tong L. Crystal structures of substrate complexes of malic enzyme and insights into the catalytic mechanism. *Structure*. 2003; 11: 1141–1150. PMID: [12962632](https://pubmed.ncbi.nlm.nih.gov/12962632/)
21. Kim P, Laivenieks M, Vieille C, Zeikus JG. Effect of overexpression of *Actinobacillus succinogenes* phosphoenolpyruvate carboxykinase on succinate production in *Escherichia coli*. *Appl Environ Microbiol*. 2004; 70: 1238–1241. PMID: [14766613](https://pubmed.ncbi.nlm.nih.gov/14766613/)
22. Masters PS, Hong JS. Genetics of the glutamine transport system in *Escherichia coli*. *J Bacteriol*. 1981; 147: 805–819. PMID: [6115851](https://pubmed.ncbi.nlm.nih.gov/6115851/)
23. Zelcbuch L, Antonovsky N, Bar Even A, Levin Karp A, Barenholz U, Dayagi M, et al. Spanning high-dimensional expression space using ribosome-binding site combinatorics. *Nucleic Acids Res*. 2013; 41: e98. doi: [10.1093/nar/gkt151](https://doi.org/10.1093/nar/gkt151) PMID: [23470993](https://pubmed.ncbi.nlm.nih.gov/23470993/)
24. Heckman KL, Pease LR. Gene splicing and mutagenesis by PCR-driven overlap extension. *Nat Protoc*. 2007; 2: 924–932. PMID: [17446874](https://pubmed.ncbi.nlm.nih.gov/17446874/)
25. Thomason LC, Costantino N, Court DL. *E. coli* Genome Manipulation by P1 Transduction. *Curr Protoc Mol Biol*. 2007; 1: 1.17.11–11.17.18.
26. Baba T, Ara T, Hasegawa M, Takai Y, Okumura Y, Baba M, et al. Construction of *Escherichia coli* K-12 in-frame, single-gene knockout mutants: the Keio collection. *Mol Syst Biol*. 2006; 2: 2006–2008.
27. Cherepanov PP, Wackernagel W. Gene disruption in *Escherichia coli*: TcR and KmR cassettes with the option of Flp-catalyzed excision of the antibiotic-resistance determinant. *Gene*. 1995; 158: 9–14. PMID: [7789817](https://pubmed.ncbi.nlm.nih.gov/7789817/)
